1 **CRISPR Screens Identify Essential Cell Growth Mediators in BRAF-**  
2 **inhibitor Resistant Melanoma**

3 Ziyi Li<sup>1,2,#</sup>, Binbin Wang<sup>1,3,#</sup>, Shengqing Gu<sup>3</sup>, Peng Jiang<sup>3</sup>, Avinash Sahu<sup>3</sup>, Chen-Hao Chen<sup>3</sup>,  
4 Tong Han<sup>1</sup>, Sailing Shi<sup>1</sup>, Xiaoqing Wang<sup>2</sup>, Nicole Traugh<sup>2</sup>, Hailing Liu<sup>1</sup>, Yin Liu<sup>4</sup>, Qiu Wu<sup>1</sup>,  
5 Myles Brown<sup>2,5</sup>, Tengfei Xiao<sup>2,\*</sup>, Genevieve M. Boland<sup>6,7,\*</sup>, X. Shirley Liu<sup>3,5,\*</sup>

6 <sup>1</sup> *Clinical Translational Research Center, Shanghai Pulmonary Hospital, School of Life*  
7 *Sciences and Technology, Tongji University, Shanghai 200092, China.*

8 <sup>2</sup> *Department of Medical Oncology, Dana-Farber Cancer Institute and Harvard Medical*  
9 *School, Boston, MA 02215, USA.*

10 <sup>3</sup> *Department of Data Sciences, Dana-Farber Cancer Institute, Harvard T.H. Chan School of*  
11 *Public Health, Boston, MA 02115, USA.*

12 <sup>4</sup> *Department of Clinical Laboratory, Shanghai Pulmonary Hospital, Tongji University*  
13 *School of Medicine, Shanghai 200433, China.*

14 <sup>5</sup> *Center for Functional Cancer Epigenetics, Dana-Farber Cancer Institute, Harvard T.H.*  
15 *Chan School of Public Health, Boston, MA 02115, USA.*

16 <sup>6</sup> *Center for Cancer Research, Massachusetts General Hospital, Harvard Medical School,*  
17 *Boston, MA 02114, USA.*

18 <sup>7</sup> *Department of Surgery, Massachusetts General Hospital, Harvard Medical School, Boston,*  
19 *MA, USA.*

20 # Equal contribution.

21 \* Corresponding authors.

22 Email: xshliu@ds.dfci.harvard.edu (Shirley L), GMBOLAND@partners.org (Genevieve B),  
23 xtfmail@gmail.com (Tengfei X).

24

25 **Abstract**

26 BRAF is a serine-threonine kinase that harbors activating mutations in ~7% of human  
27 malignancies and ~60% of melanomas. Despite initial clinical responses to BRAF inhibitors  
28 (BRAFi), patients frequently develop drug resistance. To identify candidate therapeutic  
29 targets for BRAFi-resistant melanoma, we conducted CRISPR screens in melanoma cells  
30 harboring an activating BRAF mutation that had also acquired resistance to BRAFi. The  
31 screens identified pathways and genes critical for BRAFi resistance in melanoma cells. To  
32 investigate the mechanisms and pathways enabling resistance to BRAFi in melanomas, we  
33 integrated expression data, ATAC-seq, and CRISPR screen results. We identified the JUN  
34 family of transcription factors and the ETS family transcription factor ETV5 as key  
35 regulators of CDK6 that enabled resistance to BRAFi in melanoma cells. Our findings reveal  
36 genes whose loss of function conferred resistance to a selective BRAF inhibitor, providing  
37 new insight into signaling pathways that contribute to acquired resistance in melanoma.

38

39 **KEYWORDS:** Drug resistance; CRISPR screen; Melanoma; BRAF inhibitor; Gene  
40 regulation

## 41 **Introduction**

42 Melanoma is an aggressive malignancy with a poor prognosis. The median survival for  
43 patients with stage IV melanoma ranges from 8 to 18 months after diagnosis, depending on  
44 the substage [1]. Somatic mutations in BRAF, most commonly V600E or V600K [2], are the  
45 most frequently identified cancer-causing mutations in melanoma, and recurrently appear in  
46 colorectal cancer, non-small cell lung carcinoma, and many other cancers [3]. BRAF encodes  
47 a protein belonging to the RAF family of serine/threonine protein kinases. This protein plays  
48 a role in regulating the ERK signaling pathway, which affects cell division, differentiation,  
49 and cell death [4]. The RAS–RAF–MEK–ERK pathway mediates intracellular responses to  
50 growth signals and plays an essential role in tumor progression and metastasis [5].

51 The frequency of BRAF mutations in metastatic melanoma motivated the development of  
52 small molecules targeting mutant BRAF [4]. Early trials indicated that BRAFi treatment  
53 showed great promise as a therapeutic strategy for melanomas harboring activating *BRAF*  
54 V600E mutations, and was associated with high levels of response [6-8]. BRAF inhibitors  
55 vemurafenib and dabrafenib led to improved progression-free survival (PFS) and/or overall  
56 survival (OS) versus chemotherapy alone and were approved for the treatment of BRAF-  
57 mutant metastatic melanoma [9]. Although a subset of BRAF-mutant cancers respond to  
58 small molecule inhibitors of BRAF, the disease usually relapses with acquired resistance  
59 [10].

60 Multiple mechanisms of acquired resistance have been reported. The appearance of  
61 BRAF amplifications, BRAF splice variants, and secondary mutations in BRAF such as  
62 L514V and L505H can confer resistance to BRAFi [7, 11, 12]. Hyper-activation of  
63 components in the RTK-RAS-ERK pathway [13, 14] and persistent expression of the RTK  
64 platelet-derived growth factor receptor- $\beta$  (PDGFR $\beta$ ) or insulin growth factor-1 receptor (IGF-  
65 1R) [13, 15] also led to BRAFi resistance. Activation of other growth pathways, such as  
66 mTOR and PI3K, have also been implicated in acquired resistance to BRAFi [16, 17]. The  
67 mechanisms of acquired resistance that occur outside of the BRAF gene represent possible  
68 targets for combination therapies to counteract BRAFi resistance.

69 Most tumors, including melanoma, are considered a disease of abnormality in the cell  
70 cycle [18]. In melanoma, Cyclin D1 amplification rate is 11%, and this increases to 17% in  
71 BRAF V600E melanoma, suggesting a potential role of cyclin D1 in intrinsic resistance to  
72 BRAF inhibitors [19]. Increased CDK4 activity also occurs in the majority of melanomas,  
73 and CDK4 has been implicated in BRAF inhibitor resistance [19]. Previous studies

74 demonstrated that CDK4/6 inhibitors reduced melanoma cell growth and synergized with  
75 BRAF and MEK inhibitors [20-22]. These studies promoted the clinical trials of combined  
76 inhibition of BRAF and CDKs. However, it is unknown whether the efficacy of combined  
77 pan-CDK4/6 inhibitors with BRAFi is more through CDK4 or CDK6. Studies on the  
78 mechanisms of BRAFi resistance will yield important information about the signaling  
79 pathways of melanoma pathogenesis as well as how to circumvent this resistance and  
80 improve efficacy of drugs.

81 In order to systematically investigate BRAFi resistance mechanism in melanoma, we  
82 conducted a series of experiments in BRAF (V600E) cell lines that had obtained resistance to  
83 the BRAFi PLX4032 following chronic exposure [13]. Specifically, our integrative analyses  
84 of CRISPR screens, transcriptome and epigenetic profiling, revealed pathways and genes  
85 associated with BRAFi resistance and tested candidate combination treatments to counter  
86 BRAFi resistance.

## 87 **Results**

### 88 **CRISPR knockout screens in a BRAF-mutant BRAFi-resistant melanoma cell line**

89 To identify genes whose loss of function may counteract resistance to BRAFi, we performed  
90 a CRISPR genetic screen in the human melanoma cell line M238R1 [13]. M238R1 is BRAFi-  
91 resistant and was derived from long-term high-dose PLX4032 treatment of parental cell line  
92 M238 [13]. PLX-4032 and PLX-4720 are both BRAF inhibitors and structurally similar, but  
93 PLX-4720 is reported to better inhibit BRAF V600E and to respond better in patient tumor-  
94 derived xenografts [23, 24]. To confirm the acquired resistance, we conducted a dose-  
95 response assay with PLX-4720 (Figure S1A). The IC<sub>50</sub> value of the resistant line was  
96 significantly higher than that of the parental line. Previous studies indicated that secondary  
97 mutations in BRAF could lead to BRAFi resistance [11]. To rule out the possibility that  
98 secondary mutations in BRAF led to BRAFi resistance in M238R1, we sequenced the BRAF  
99 coding region. We observed the V600E mutation as expected (Figure S1B), but no other  
100 secondary mutations in the BRAF coding region. Meanwhile, there is no BRAF amplification  
101 and alternative splicing variants confer BRAFi resistance in this cell lines [25]. This indicates  
102 that the drug resistance acquired by M238R1 is not due to a new genetic alteration inside the  
103 BRAF coding region.

104 To identify the genes that confer resistance to BRAF inhibition, we designed a new  
105 CRISPR sgRNA library targeting 6000 cancer-related genes (6K-cancer library, TableS 1)  
106 based on Cosmic [26] and Oncopanel [27] (Figure 1A and Methods). For each gene, we

107 designed ten 19-bp sgRNAs against the coding region with optimized cutting efficiency and  
108 minimized off-target potential using our predictive model [28]. The library contained 1466  
109 sgRNAs against 147 genes essential for cell proliferation as positive controls [29], and 795  
110 non-targeting sgRNAs and 891 sgRNAs targeting AAVS1, ROSA26, and CCR5 as negative  
111 controls. We performed two independent, pooled CRISPR screens by transducing a 6K-  
112 cancer library of lentivirus to the BRAFi-resistant cells M238R1 (Figure 1B). After viral  
113 transduction, we treated the melanoma cells with DMSO or 1 $\mu$ M PLX-4720, an optimal dose  
114 chosen based on our preliminary tests (Figure S1A). After 14 days of culturing, we harvested  
115 cells from the different treated groups and extracted genomic DNA for PCR the region  
116 containing sgRNAs. Then we quantified the abundance of sgRNAs through next-generation  
117 sequencing (NGS).

118 Screen data were analyzed by MAGeCK-VISPR, a statistical algorithm developed for  
119 CRISPR screen analyses [30]. MAGeCK-VISPR compares the sgRNA abundance of all of  
120 the sgRNAs targeting a gene across different conditions and assigns each gene a log fold-  
121 change “beta score ( $\beta$ )” of essentiality in each condition compared with Day 0 control. A  
122 positive  $\beta$ -score indicates that silencing corresponding gene provides a growth advantage  
123 under the positive selection. In contrast, the negative  $\beta$ -score indicates that silencing the gene  
124 confers a growth or survival disadvantage under the negative selection. Replicate screen from  
125 the duplicate transductions showed a good correlation at the gene level (Figure 1C). To assess  
126 the initial quality of our screen, we check the mapping ratio, the number of missed sgRNAs,  
127 and the evenness of sgRNAs (Figure S2). The majority of library was maintained in the viral  
128 transduction, with a small amount of missing sgRNA library constructs (Figure S2B). All  
129 these results indicated that the screens functioned as designed.

130 Most genes that were positively or negatively selected behaved similarly in the control  
131 and treatment conditions (Table S2). Genes positively selected in both conditions were  
132 enriched for known tumor suppressors, such as NF1, NF2 as expected (Figure S3A and  
133 B). Consistent with prior work, essential genes highly overlapped between different  
134 conditions strongly enriched for roles in fundamental biological processes, such as gene  
135 expression, RNA processing, and translation (Figure S3C and D). These results are consistent  
136 with a properly functioning CRISPR screen.

### 137 **Identification of genes essential specifically for growth of cells resistant to PLX-4720**

138 To explore which genes might play a role in the BRAFi-resistance, we performed further  
139 analysis of CRISPR screen data using MAGeCKFlute [29]. MAGeCKFlute facilitates  
140 comparison of  $\beta$  score between different conditions. We adopted a “quantile matching”

141 approach to robustly estimate  $\sigma$ , which is the standard deviation of the differential  $\beta$  score  
142 (Figure S4A). We identified genes whose  $\beta$  score decreased in the presence of BRAFi  
143 treatment compared to DMSO treatment (Figure S4B and Table S2). Then, we selected 322  
144 candidates whose disruption does not normally affect survival but becomes lethal in the drug  
145 treatment condition. We ranked the identified hits by the change of the  $\beta$  score (Figure 1D).  
146 Here, we labeled the top 10 genes, such as *SOS1*, *PURA*, *HRAS*, *SAFB*, *CRKL*, *ETV5*, *CDK6*,  
147 *DYNCH1*, *H2AFX* and *MAZ*. Among these 322 candidate genes, *HRAS*, *SRC*, *SOS1*, *EGFR*,  
148 and *RAF1* were previously reported to be involved in BRAFi resistance [31, 32] (Figure 1E).

149 To further understand the pathways conferring BRAFi-resistance, we performed  
150 GO/GSEA/pathway analyses with the 322 candidate genes (Figure 1F). Among the network  
151 of genes whose  $\beta$  score decreased after drug treatment, we found that the ERBB2 signaling  
152 pathway, RAS pathway, ERK pathway, MAPK pathway, and EGFR signaling pathway are  
153 highly enriched. These results are consistent with previous studies [13, 31, 33, 34]. Besides  
154 these known pathways, cell-cycle genes, and G1/ transition S of mitotic cell cycle were the  
155 most enriched newly discovered class (Figure 1F), represented by *CDK6*, *CCND1*, *PSMB1*,  
156 and *RRM2*.

### 157 **CDK6 confer resistance to BRAF inhibition in melanoma cells**

158 We next sought to determine whether any genes whose upregulation confers resistance to  
159 BRAF inhibition in melanoma cells. To assess this, we analyzed previously generated gene  
160 expression profiles in parental versus resistant cells treated with PLX4720 or treated with  
161 DMSO [13]. In the sensitive cells, PLX4720 induced widespread changes in gene expression  
162 (Figure S5A). Our analysis showed that the MAPK signaling pathway and the PI3K-AKT  
163 pathway were down-regulated, consistent with previous studies [13, 14] (Figure S5B). The  
164 resistant line exhibited fewer differentially expressed genes upon PLX4720 treatment (Figure  
165 S5C). We next analyzed the genes that were differentially expressed between the resistant  
166 line and the parental line upon PLX4720 treatment. Under BRAFi treatment, there are 1,374  
167 up-regulated and 1,574 down-regulated genes in resistant cells relative to sensitive cells  
168 (Figure 2A and Table S3). Our re-analyses confirmed the previously reported overexpression  
169 of *KIT*, *MET*, *EGFR*, and *PDGFRB* in M238R1 relative to the parental line [13]. In addition,  
170 we found that the cell cycle genes *CDK6*, *CCND1*, and transcription factor (TF) *JUN* were  
171 up-regulated in resistant cells compare to the parental cells (Figure 2A).

172 We hypothesized that genes with elevated expression in BRAFi resistant cells, as well as  
173 the loss of function restored the drug sensitivity, may be responsible for the resistance  
174 phenotype. We next integrated the expression results and CRISPR screen results to identify

175 the dysregulated genes related with BRAFi resistance. Within the 322 genes whose depletion  
176 sensitize cells to BRAFi, there are 12 genes, including CDK6, specifically over-expressed in  
177 BRAFi-resistant cells (Figure 2B). This suggests that 21 genes might be associated with the  
178 resistance to BRAFi and mediate cell proliferation in the resistance line.

179 To explore the potential druggable targets for the BRAFi-resistant cells, we further  
180 filtered the candidate gene with DGIdb [35]. DGIdb is a carefully curated database of  
181 published information on drug-gene interactions and the druggable genome. It offers user-  
182 friendly functions for browsing, searching, and filtering. DGIdb identified CDK6 as a  
183 potential druggable target with the FDA approved drugs for BRAFi-resistant cells. CDK6 is  
184 regulated by Cyclin D proteins and Cyclin-dependent kinase inhibitor proteins. Altered  
185 expression of these cell cycle genes has been observed in multiple human cancers [36, 37].  
186 CDK6-targeting sgRNAs were markedly depleted in the PLX-4720 condition compared to  
187 the DMSO condition (Figure S6A), suggesting that loss-of-function of CDK6 can cause cells  
188 sensitive to PLX-4720. To validate this result from the initial screen, we used five  
189 independent sgRNAs to knockout CDK6 in the M238R1 cell line (Figure 2C). Consistent  
190 with our screen data, CDK6 knockout cells showed increased sensitivity to PLX-4720 in  
191 long-term colony-formation viability assays (Figure 2D). Most tumors including melanoma  
192 have an abnormal G1-to-S transition, mainly due to dysregulation of CDKs activities [38, 39].  
193 We wondered if the increased essentiality we observed for CDK6 was a general property of  
194 CDKs or was specific to CDK6. We specifically evaluated the changes in essentiality of the  
195 other CDKs (Figure S6B). Among all CDKs, only CDK6 is more highly expressed in the  
196 resistant cell line compared to the sensitive cell line and becomes more essential in the  
197 presence of BRAFi.

### 198 **Exploring the Mechanism of Gene Regulation in BRAFi Resistance through Chromatin** 199 **Changes**

200 Epigenetic changes are important features of cancer cells with acquired drug-resistant  
201 phenotypes and may be a crucial contributing factor to the development of resistance. To  
202 model the epigenetic features associated with BRAFi resistance, we used ATAC-Seq to  
203 compare the chromatin accessibility [40] difference between the resistant and parental lines  
204 treated with PLX-4720. On average, we sequenced each sample at ~50 million PE150  
205 fragments and observed ~89% uniquely mapped ratio (Table S4). We evaluated the quality of  
206 deep-sequencing data in diverse sections, such as including the uniquely mapped reads, PCR  
207 bottleneck coefficient (PBC) score, High quality peaks number, fraction of non-mitochondrial  
208 reads in peak region (FRiP), peaks overlapping with union of DNaseI peaks (DHS) (Figure

209 S7). The ATAC-seq profiles showed the high-quality features according the criteria defined  
210 by Cistrome database, which is a data portal for more than 8,000 ChIP-Seq and chromatin  
211 accessibility data in human and mouse [41].

212 In total, 113,725 high-confidence open chromatin regions (or peaks) were identified in the  
213 parental line, and 96,038 peaks were identified in resistant line. Of the distinct peaks, we  
214 identified the peaks more accessible in parental cells (M238-specific peaks), and the peaks  
215 more accessible in resistant cells (M238R1-specific peaks) (Figure 3A and Table S5).  
216 Analyzing peaks of accessible chromatin in aggregate provides estimates of the enrichment of  
217 transcription factor (TF) binding [42]. M238R1-specific peaks are enriched for genomic  
218 locations bound by the AP-1 superfamily, including ATF3, JUNB, AP-1, BATF and JUN  
219 (Figure 3B). To investigate the relationship between activated TFs and their target genes, we  
220 integrated the ATAC-seq results with gene expression results. We identified the genes that  
221 were up-regulated in M238R1 treated with BRAFi and also associated with M238R1-  
222 sepecific peaks. These genes are related to EGFR signaling, epithelial cell proliferation, skin  
223 development, and angiogenesis (Figure 3C), which are fundamental biological processes of  
224 melanoma development. Therefore, analysis of the ATAC-seq data in conjunction with the  
225 expression data revealed a set of TFs and their target genes that are associated with BRAFi  
226 resistance.

### 227 **Identification of the JUN family and ETV5 as key regulators of CDK6**

228 To identify the transcription factors that regulate CDK6 expression, we used the Cistrome  
229 ToolKit [41]. The Toolkit allows users to find the factors which might regulate the user-  
230 defined genes through public ChIP-seq (protein factors and histone marks), chromatin  
231 accessibility (DNase-seq and ATAC-seq) data. We found the AP-1 superfamily JUN, JUNB,  
232 and BATF as the putative transcription factors regulating CDK6 (Figure 4A), consistent with  
233 previous studies [43, 44]. While all of the transcription factors might regulate CDK6, both  
234 expression level (Figure 2A) and chromatin accessibility (Figure 4B) of JUN are higher in the  
235 resistant cells. JUN upregulation is a common response to BRAF inhibitor treatment in  
236 clinically treated patient tumors and acts as a key mediator of the drug resistance [45, 46]. In  
237 addition, JUN is required for cell cycle progression through G1 [47]. As *CDK6* knockout  
238 restored sensitivity to BRAFi treatment in M238R1 cells (Figure 2C and D) and *CDK6*, *JUN*  
239 were up-regulated in resistant cells compare to the parental cells, we concluded that  
240 dysregulation of CDK6 by JUN mediated resistance to BRAF inhibition in melanoma cells.

241 To assess other genes that might act with JUN to regulate CDK6, we examined the set of  
242 genes that physically interact with the JUN protein according to the STRING database and



243 genes whose essentiality increased after BRAFi treatment. We identified ETV5 as being in  
244 both of these gene sets (Figure 4C). ETV5 is a member of the ETS family of transcription  
245 factors which controls cell cycle gene expression and contributes to tumorigenicity [48].  
246 Increased expression of ETV transcription factors modulates the response to MEK inhibition  
247 [49]. Motif enrichment analysis of ChIP-seq data can help us identify transcription factors  
248 that cooperate with ETV5. According to the Cistrome Data Browser [41], the JUN motif is  
249 enriched ETV5 ChIP-seq peaks, suggesting JUN family might be a co-factor of ETV5  
250 (Figure 4D). Consistent with the hypothesis that ETV5, JUN, and JUNB directly regulate  
251 CDK6, these TFs have strong binding around the CDK6 gene (Figure S8C). We found that  
252 ETV5 deletion reduced sensitivity to BRAF inhibition by PLX-4720 in melanoma cells and  
253 ETV5 was the top hit of the genes that were more essential in the BRAFi treatment condition  
254 (Figure 1D). Similar to CDK6, the normalized sgRNA read counts of ETV5 continually  
255 decrease in the DMSO treatment or PLX-4720 treatment (Figure S8A and B). Finally, we  
256 experimentally validated that the depletion of ETV5 decreases the expression of CDK6  
257 (Figure 4E). These observations suggest that CDK6 mediate resistance to BRAF inhibition by  
258 the collaborative regulation of TFs JUN and ETV5, which increased expression of CDK6 and  
259 promote the cell proliferation.

#### 260 **Dual inhibition of BRAF and CDK6 in BRAFi-resistant cell lines**

261 Palbociclib (IBRANCE, Pfizer Inc.) is an inhibitor of CDK4 and CDK6 approved by the  
262 FDA in many cancer types [50]. CDK inhibitor, and combination of BRAFi or MEKi or a  
263 CDK4 inhibitor significantly suppresses growth and enhances apoptosis in melanoma cells  
264 [21, 22]. However, the efficacy combination therapy of pan-CDK4/6 inhibitors with BRAFi is  
265 more through CDK4 or CDK6, which remains poorly understood. Here, we first examined the  
266 changes in essentiality of the other CDKs (Figure S6B). Among all CDKs, only CDK6 is  
267 more highly expressed in the resistant cell line compared to the sensitive cell line and  
268 becomes more essential in the presence of BRAFi. Further we assessed the synergy between  
269 CDK6 and BRAF inhibition on BRAFi resistant cells. To verify the activity of Palbociclib,  
270 we showed that 1 $\mu$ M of palbociclib effectively reduced the phosphorylation of CDK6's  
271 substrate RB1 (Figure 5A). We then treated BRAFi resistant cells with palbociclib and/or  
272 PLX-4720 and observed that inhibition of CDK6 sensitized cells to PLX-4720 treatment in a  
273 clonogenic assay (Figure 5B). This treatment combination is highly synergistic across a broad  
274 range of concentrations according to the Bliss independence model, especially in the resistant  
275 lines (Figure 5C, 5D and Figure S9). These results support the potential of CDK6 and BRAF  
276 dual inhibition as a therapeutic strategy to overcome BRAFi resistance in our resistant model.

277 **CDK6 expression is negatively associated with overall survival in BRAF-mutant**  
278 **melanomas treated with BRAFi**

279 To determine whether the expression of any validated BRAFi-resistant genes we identified  
280 correlated with resistance to BRAF inhibitor therapy in melanomas, we analyzed expression  
281 data from two independent cohorts [33, 51]. In cohort one [51], 18 patients were treated  
282 either with BRAFi alone (12 patients) or dual BRAFi and MEKi therapies (6 patients). RNA-  
283 seq data on serial tumor biopsies of matched pre-treatment and relapsed tumors were  
284 available. In cohort two, 22 patients with advanced melanoma were treated with BRAFi (7  
285 patients) or BRAFi plus MEKi (15 patients) [33]. RNA-seq data on pre-treatment, on-  
286 treatment, or relapsed tumors were available, although they were not paired. These samples  
287 were classified into 3 groups: 14 pre-treatment specimens, 12 on-treatment specimens, and 12  
288 clinical progression specimens. Of the 21 over-expressed genes also identified in our  
289 CRISPR screen, *CDK6*, *CCND1*, and *ETV5* were more highly expressed in the tumors that  
290 have relapsed after BRAFi treatment relative to the on-treatment groups (Figure 6A).

291 We next investigated whether CDK6 upregulation might be associated with clinical  
292 resistance in some cases. To facilitate this, we generated a 10-gene CDK6 expression  
293 “signature” (Table S6). This 10-gene proliferation signature consists of cell proliferation  
294 genes [33] and interaction partners of CDK6 predicted by STRING database. We observed a  
295 negative correlation between the CDK6 signature and the progression-free survival (PFS) in  
296 samples of both cohorts (Figure 6 B-D). To further clarify the relationship between CDK6  
297 signature and clinical outcome not by the different drug treatment, we separated samples with  
298 different drug-treatment condition (BRAFi alone or BRAFi plus MEKi). CDK6 signature was  
299 correlated with poor progression-free survival (PFS) of melanoma patients treated with either  
300 BRAFi alone or BRAFi plus MEKi (Figure S9 A-C). We used these ten genes to split the  
301 samples into CDK6 signature low and CDK6 signature high groups and assessed their  
302 prognostic value in melanoma patients of both clinical cohorts. Clinically, melanoma patients  
303 classified as CDK6 signature high experienced shorter progression-free survival with respect  
304 to CDK6 signature low cases (Figure 6 E and F). Consistent with this, high level of CDK6  
305 signature associated with shorter PFS of the patients either treated with BRAFi alone or  
306 BRAFi plus MEKi (Figure S9 D and E). This data suggests that high expression of genes  
307 functionally connected to CDK6 associates with poor survival and acquired drug resistance in  
308 BRAFi-treated melanoma patients. Overall, these observations provide initial support for the  
309 notion that CDK6 upregulation by transcription factors JUN and ETV5 might be associated  
310 with clinical resistance to BRAFi in melanoma patients.

## 311 **Discussion**

312 Acquired resistance to anticancer agents is frequently encountered in clinical practice.  
313 BRAFi-resistance is widely studied but remains a clinical challenge [13, 14, 16, 52]. For this  
314 reason, it is critical to direct research efforts to investigate the mechanisms underlying drug  
315 resistance and design alternative therapeutic strategies to overcome drug resistance.  
316 Resistance to kinase inhibitors is often associated with secondary mutations in the target gene,  
317 which render the kinase insensitive to the inhibitor [11]. However, in the BRAFi acquired  
318 resistant cell line, we did not find secondary mutations in BRAF that could explain the  
319 resistance to BRAF inhibitors. Drivers of acquired resistance to BRAF inhibitor therapy are  
320 diverse and include mechanisms leading to reactivation of the MAPK pathway [34]. But the  
321 M238 R1 was sensitive to PLX4032-induced decreases in the levels of p-MEK1/2 and p-  
322 ERK1/2 [13]. Understanding the gene regulation by which cancer cells evade BRAF  
323 inhibition may speed the development of new therapeutic strategies in BRAF-mutant  
324 melanoma patients and other BRAF-dependent tumors.

325 Several genome-wide CRISPR pooled screens have uncovered mediators of drug  
326 resistance [53, 54]. In this study, we used CRISPR screens to systematically characterize  
327 resistance to BRAF inhibitor PLX-4720 in melanoma. Our screen identified both previously  
328 known and novel resistance genes to BRAF inhibition. Previously reported genes were  
329 identified by our screen, including *CCND1*, *RAF1*, *EGFR*, and *SRC* [19, 31, 34]. Among the  
330 network of genes whose  $\beta$  score decreased after drug treatment, we also found that the  
331 ERBB2 signaling pathway, c-Myc pathway, regulation of RAS family activation, and EGFR  
332 signaling pathway represent examples of known pathway-dependent resistance mechanisms  
333 [13, 31, 33, 34, 55]. Besides cell-cycle genes were the most enriched newly discovered class  
334 (Figure 1F), represented by *CDK6*, *CCND1*, *PSMB1*, and *RRM2*. These findings affirm the  
335 ability of large-scale functional screens to reveal biologically and clinically relevant drug  
336 resistance mechanisms.

337 Our approach also uncovered depletion of CDK6 and ETV5 restored the sensitivity to  
338 BRAF inhibition in BRAFi-resistant cells. To search for the key regulators of BRAFi  
339 resistance, we analyzed gene expression data, chromatin accessibility data, and our CRISPR  
340 screen results. Our observations indicate that overexpression of cell cycle gene *CDK6*, which  
341 regulated by transcription factors JUN and ETV5, may confer resistance to BRAF inhibition.  
342 Indeed, a prior study suggested that overexpression of a single ETS transcription factor  
343 conferred resistance to trametinib, suppression of ETV1, ETV4, or ETV5 alone strongly

344 decreased the resistance conferred by CIC deletion [49]. In a previous study, the researchers  
345 demonstrated that the inherent resistance to BRAFi/MEKi in melanoma cell lines was  
346 associated with a high abundance of JUN [45]. However, JUN family members are not  
347 essential for the BRAFi-resistant cell lines. We hypothesize that many JUN family members  
348 could collaborate with ETV5 to regulate CDK6, such that the absence of any one member  
349 would not lead to cell death. Thus, our integrative analyses of the epigenetic, transcriptional  
350 data with genetic screening provided insights into the regulation of BRAFi resistance in  
351 melanoma patients.

352 Palbociclib, an FDA approved drug established to target CDK4/6, has been evaluated in  
353 ~30 different cancer indications [50, 56]. Combining palbociclib with PLX-4120 reduced the  
354 proliferation of M238R1 and M229R5, which are BRAFi-resistant melanoma cells. Indeed,  
355 prior studies suggested that CDK4/6 inhibition combined with BRAFi inhibited the growth of  
356 several melanoma cell lines in vitro and in vivo [20-22]. However, these studies did not  
357 determine whether the efficacy of combined CDK4/6 inhibitors with BRAFi was specific to  
358 the inhibition of CDK4 or CDK6. Here, we evaluated the essentiality of all CDKs in  
359 acquired-BRAFi-resistance cells. Of all the CDKs, only CDK6 is more highly expressed in  
360 the resistant cells compared to the sensitive cells, and only CDK6 and becomes more  
361 essential in the presence of BRAFi (Figure S5B). Thus, our study demonstrates the feasibility  
362 of genome-wide pooled CRISPR-Cas9 knockout screens of resistant cells for uncovering  
363 genetic vulnerabilities that may be amenable to therapeutic targeting.

364 We found that *CDK6* deletion reduced resistance to BRAFi treatment in vitro and  
365 demonstrated that the CDK6 inhibitor palbociclib act synergistically with BRAFi to halt cell  
366 growth in BRAFi-resistant cell lines. To further demonstrate the potential combination  
367 therapy, we tried to generate M238R1 xenografts. However, this effort failed, consistent  
368 reports from the lab that derived the resistant cell line (Lo Lab, personal communication).  
369 Additional evidence that *CDK6*, *ETV5* and *JUN* may confer resistance to BRAF inhibition in  
370 cancer emerged from our analysis of two independent melanoma cohorts. This analysis  
371 revealed high levels of CDK6 and ETV5 in tumors that acquire resistance to BRAFi  
372 treatment, thereby providing genetic evidence that these signaling pathways may dysregulate  
373 upon BRAF inhibition. A high *CDK6* signature score is associated with the poor progression-  
374 free survival of melanoma patients in both clinical cohorts. These observations suggest that  
375 elevated global expressions of CDK6, JUN and ETV5 modulate the response to BRAF  
376 inhibitor treatment. Our study strengthens this link by demonstrating that a combination of  
377 CDK6 inhibitor and BRAF inhibitor can overcome BRAFi resistance.

378 In conclusion, this study shows that there was a significant increase of CDK6 expression  
379 in the BRAFi-resistant cell lines and progressive tumors. Through the loss-of-function  
380 screens, epigenetic profiles, and gene expression analysis, we have identified a network that  
381 includes CDK6, ETV5, and JUN as the potential mechanism for BRAFi-resistant melanoma  
382 cells. Our findings offer new insights into resistance to BRAF inhibitors and support clinical  
383 studies of combined BRAF and CDK6 inhibition in a subset of activating BRAF mutations  
384 subject to relapse through acquired resistance.

## 385 **Materials and methods**

### 386 **Cell Culture and compounds**

387 Human melanoma paired cell lines were gifts from the Roger Lo lab. Cells were maintained  
388 in Dulbecco's modified Eagle medium (DMEM) with 10% fetal bovine serum, glutamine and  
389 1% penicillin/streptomycin. These BRAFi-sensitive human melanoma cell lines (M series)  
390 were established from patient's biopsies under UCLA IRB approval #02-08-067 [57]. And  
391 BRAFi-resistant human melanoma cell lines were derived from long-term high-dose  
392 PLX4032 treatment of parental cell line M238 [13]. All cell lines were mycoplasma free. For  
393 packaging virus, HEK293T cells were grown in DMEM with 10% FBS, glutamine and 1%  
394 penicillin/streptomycin. Stocks of BRAF inhibitor PLX4720 (Catalog No. S1152) and CDK6  
395 inhibitor palbociclib Isethionate (PD0332991, Catalog No. S1579) were purchased from  
396 Selleck Chemicals.

### 397 **Library design**

398 To design a smaller-scale CRISPR/Cas9 knockout screen library focusing on cancer-related  
399 genes, we selected 6000 genes based on reported relevancies with cancers using multiple  
400 sources, including Cosmic and Oncopanel (Table S1). For each gene, we designed ten 19nt  
401 single-guide RNA (sgRNA) against its coding region with optimized cutting efficiency and  
402 minimized off-target potentials. We used sequence features of the spacers to calculate the  
403 cutting efficiency score for each sgRNA using our predictive model. We used BOWTIE to  
404 map all candidate sgRNAs to hg38 reference genome, and chose those with fewest potential  
405 off-targets. We selected the 10 best sgRNAs for each gene based on the considerations above.  
406 The library also contains both positive controls and two types of negative controls: non-  
407 targeting controls and non-essential-region targeting sgRNAs.

408 a) Positive controls: we included 1466 sgRNAs targeting 147 positive control genes, which  
409 are significantly negatively selected in multiple screen conditions.

410 b) Non-targeting negative controls: 795 sgRNAs with sequences not found in genome.

411 c) Non-essential-region-targeting negative controls: 1891 sgRNAs targeting AAVS1,  
412 ROSA26, and CCR5, which have been reported as safe-harbor regions where knock-in  
413 leads to few detectable phenotypic and genotypic changes.

#### 414 **Cloning of individual sgRNAs and sgRNA libraries**

415 For the 6K-cancer library, we used the lentiCRISPR v2 vector (also available at Addgene,  
416 plasmid #52961) as backbone [58]. We designed ten sgRNAs per gene to target ~6,000 genes  
417 and added non-targeting sgRNAs as controls (Table S1). For library construction, we used a  
418 previously published protocol [54]. For individual sgRNA cloning, pairs of oligonucleotides  
419 (IDT) with BsmBI-compatible overhangs were separately annealed and cloned into the  
420 lentiCRISPR v2 vector using standard protocols [58]. The sequences of individual sgRNAs  
421 for *CDK6* and *ETV5* are shown in Table S7.

#### 422 **Virus production and infection**

423 Lentivirus was generated in HEK293T cells by transfecting cells with packaging DNA plus  
424 lenti-CRISPR vectors. For each library to be transfected, we plated HEK293T cells in 25ml  
425 of media in a 15 cm tissue culture plate. Typically, 20 µg vector DNA, 15 ug psPAX2  
426 packaging plasmid, 6 ug pMD2.G envelope plasmid and 200 ul transfection reagent X-  
427 tremeGENE were used; DNA and transfection reagent X-tremeGENE were pre-diluted in 3  
428 ml serum-free OPTI-MEM individually and then mixed. After 15 min of incubation, the  
429 DNA and transfection reagent mixtures were added to HEK293T cells seeded in the dish.  
430 After 8-12 h, the media was changed to 25 ml DMEM + 10% FBS+ 1%BSA. Viral  
431 supernatant was collected two and three days after transfection, filtered through 0.45-µm  
432 membranes, and added to target cells in the presence of polybrene (8 µg/ml, Millipore). After  
433 48h, puromycin (2 µg/ml) was used to treat cells for two days for selection, which eliminated  
434 all cells in an uninfected control group.

#### 435 **Pooled CRISPR screen**

436 For the pooled CRISPR screen, a total of  $1.2 \times 10^8$  cells were infected with the pooled  
437 lentiviral library at a MOI of 0.3. After puromycin selection, the surviving cells were divided  
438 into three groups (day0 control, vehicle, and drug treatment). For the drug treatment group,  
439 the cells were treated with 1uM PLX4720. The cells were cultured in medium for ten  
440 doubling times and split every 2-3 days before genomic DNA extraction and library  
441 amplification.

#### 442 **Amplification and sequencing of sgRNAs from cells**

443 After cell harvest, DNA was purified using QIAGEN DNeasy Blood & Tissue Kit according  
444 to the manufacturer's instruction. PCR was performed as previously described [58], and the

445 PCR products were sequenced on a HiSeq 2500. Each library was sequenced at 30~40  
446 million reads to achieve ~300X average coverage over the CRISPR library. The day 0 sample  
447 library of each screen could serve as controls to identify positively or negatively selected  
448 genes or pathways.

#### 449 **CRISPR screen analysis**

450 The CRISPR/Cas9 screening data were analyzed using MAGeCK and MAGeCK-VISPR  
451 algorithms [30]. MAGeCK-VISPR uses a metric, “ $\beta$  score”, to measure gene selections. The  
452 definition of the  $\beta$  score is similar to the term of ‘log Fold Change’ in differential expression  
453 analysis, and  $\beta > 0$  (or  $< 0$ ) means the corresponding gene is positively (or negatively) selected,  
454 respectively. We considered a  $\beta$  score of  $> 0.5$  or  $< -0.5$  as significant. MAGeCK-VISPR  
455 models the gRNA read counts as a negative binomial variable, whose mean value is  
456 determined by the sequencing depth of the sample, the efficiency of the gRNA, and a linear  
457 combination of  $\beta$  scores of the genes. MAGeCK-VISPR then builds a maximum likelihood  
458 (MLE) model to model all gRNA read counts of all samples, and iteratively estimate the  
459 gRNA efficiency and gene  $\beta$  scores using the Expectation-Maximization algorithm.  
460 Comparison between the drug treatment condition and control condition was performed using  
461 MAGeCKFlute [29], which was designed to perform quality control, normalization, gene hit  
462 identification and downstream functional enrichment analysis for CRISPR screens.

#### 463 **Microarray data analysis**

464 The expression profile GSE9340, which was downloaded from Gene Expression Omnibus  
465 database, included two BRAFi resistant cell lines (M238R and M229R) and their parental cell  
466 lines (M238 and M229). Differential expression analysis was performed using the R package  
467 limma [59]. Genes with an absolute fold change  $> 1.5$  and false discovery rate (FDR)-adjusted  
468  $P < 0.05$  were considered significant.

#### 469 **ATAC-seq**

470 ATAC-seq libraries were prepared according to the previously described Omni-ATAC  
471 protocol [60]. After the cells counting, 50,000 cells were resuspended in 1 ml of cold ATAC-  
472 seq resuspension buffer (RSB; 10 mM Tris-HCl pH 7.4, 10 mM NaCl, and 3 mM MgCl<sub>2</sub> in  
473 water). Cells were pelleted by centrifugation at 500 r.c.f at 4 °C for 5 min in a pre-chilled  
474 (4 °C) centrifuge. After centrifugation, supernatant was carefully aspirated to leave the cell  
475 pellet undisturbed. Cell pellets were then resuspended in 50  $\mu$ l of ATAC-seq resuspension  
476 buffer containing 0.1% NP40, 0.1% Tween-20, and 0.01% digitonin by pipetting up and  
477 down three times. This cell lysis reaction was incubated on ice for 3 min. After lysis, 1 ml of  
478 ATAC-seq RSB containing 0.1% Tween-20 (without NP40 or digitonin) was added, and the

479 tubes were inverted 3 times to mix. Nuclei were then centrifuged for 10 min at 500 r.c.f. 4 °C  
480 centrifuge. Nuclei were resuspended in 50 µl of transposition mix (25 µl 2× TD buffer, 2.5 µl  
481 transposase (100 nM final), 16.5 µl PBS, 0.5 µl 1% digitonin, 0.5 µl 10% Tween-20, and 5 µl  
482 nuclease-free water) by pipetting up and down six times. Transposition reactions were  
483 incubated at 37 °C for 30 min in an Eppendorf ThermoMixer with shaking at 1,000 r.p.m.  
484 Tagmented DNA was purified using the MinElute Reaction Cleanup Kit (Qiagen, 28204).  
485 The ATAC-seq library preparation was performed as described previously [40]. Then, the  
486 concentration of the library was determined using Qubit 3.0 (Life Technologies) and the size  
487 distribution was assessed using Agilent 4200 TapeStation system. Libraries were paired-end  
488 sequenced (35bp) on an Illumina NextSeq 500.

#### 489 **ATAC-seq data analysis**

490 Quality control, reads alignment, peak calling were performed by ChiLin [61]. The M238 and  
491 M238R peaks were further merged (using the BEDtools [62] ‘merge’ function). BEDtools  
492 ‘coverage’ was used to create an input matrix used for detecting differentially accessible,  
493 peaks. We assessed the significant change of chromatin accessibility between different  
494 groups using the DESeq2 R package [63]. The total count of qualified fragments in each  
495 sample was used as the library size. It was defined as significantly changed if the peak  
496 showed log<sub>2</sub> fold change > 1 and adjust P-value < 0.05. The HOMER tool suite was used for  
497 TF motif discovery, by analyzing differential motif enrichment in M238R specific element  
498 datasets against all elements (peaks) background. Regulatory potential (RP) scores derived  
499 with the BETA algorithm are used to estimate how likely a factor regulates genes [64].

#### 500 **ChIP-seq data mining in Cistrome Data Browser**

501 We used the Cistrome Data Browser Toolkit function to investigate the transcriptional factors  
502 which could regulate CDK6 [41]. This function would return a list of the transcription factors  
503 that are most likely to regulate of CDK6. To identify the potential cooperative factors of  
504 ETV5, we used the analysis results from the Cistrome Data Browser [41]. ETV5 ChIP-seq  
505 data with the high-quality (Cistrome Data Browser ID: 42714) were used to explore the  
506 potential cooperative factors of ETV5. In the "QC Motifs" panel, it shows the significantly  
507 enriched motifs of other factors in the ETV5 ChIP-seq peaks.

#### 508 **Western Blot analysis**

509 For western blotting, cells were lysed in RIPA buffer (Santa Cruz Biotechnology)  
510 supplemented with phosphatase and protease inhibitor cocktail. Protein concentrations were  
511 measured with Thermo Fisher Scientific Bradford Assay (# PI23236). ETV5 Antibody  
512 (catalog: ab102010) was purchased from Abcam, and CDK6 Antibody (catalog: sc-7961) was



513 purchased from Santa Cruz Biotechnology. ERK2 Antibody (Santa Cruz Biotechnology, sc-  
514 1647) GAPDH (Sigma, G9545), and VINCULIN (Santa Cruz Biotechnology, sc-73614) were  
515 used as a loading control. Goat anti-rabbit and Goat anti-mouse secondary antibodies were  
516 obtained from LI-COR Biosciences. The fluorescent signals were developed with Odyssey  
517 CLX Imaging System (LI-COR Biosciences).

#### 518 **Cell proliferation and colony formation assays**

519 Response to a single agent- or combination-treatment was assessed by either the CellTiter 96  
520 cell proliferation assay from Promega. Cells were seeded in 96-well plates (2,000 cells per  
521 well), and cultured 18 to 24 hours before compound addition. The cells were treated with  
522 various concentrations of BRAFi or/and CDK6i for 72 hr and then incubated with CellTiter  
523 96 AQueous One Solution Reagent for 1-4 hr per manufacturer's protocol before recording  
524 the absorbance at 490 nm on SpectraMax M2 (Molecular Devices). All experiments were  
525 performed in triplicate. For colony formation assays, cells were seeded in a 24-well plate at a  
526 density of 300, allowed to attach for 24 hours at 37°C, and then treated with PLX4720. The  
527 cells were maintained at 37°C for two weeks. Colonies of cells were then fixed with cold  
528 methanol for 25 minutes and stained with 1% crystal violet.

#### 529 **Drug synergy analysis**

530 Drug synergy was calculated based on the Bliss independence model using the  
531 SynergyFinder R package [65]. The Synergy score based on Bliss model.

532 **Author contributions**

533 SL conceptualized the study, supervised the experiments and data analysis. ZL and BW  
534 conceived and designed the study. ZL performed all experiments including the screening, in  
535 vitro experiments. SG supervised experiments and provided technical support. BW performed  
536 computational analysis of the data. GB. and AS provides the data of the patients in cohort two.  
537 CHC designed the CRISPR screen library. TX constructed the CRISPR-sgRNA library. PJ,  
538 TH, QW, and SS participated in experiments. PJ, HL, YL, and MB contributed to the  
539 discussion. SL, ZL, and BW wrote this manuscript with feedback from all other authors. All  
540 authors read and approved the final manuscript.

541 **Competing interests**

542 The authors have declared that no competing interests exist.

543 **Acknowledgments**

544 We thank the Roger Lo Lab for sharing the melanoma cell lines including the parental and  
545 resistant lines, and for helpful discussions. This project was supported by grants from the  
546 National Natural Science Foundation of China (Grant No. 81872290, 31801185).

## 547 **References**

- 548 [1] Balch CM, Gershenwald Je Fau - Soong S-J, Soong Sj Fau - Thompson JF, Thompson Jf  
549 Fau - Atkins MB, Atkins Mb Fau - Byrd DR, Byrd Dr Fau - Buzaid AC, et al. Final version  
550 of 2009 AJCC melanoma staging and classification.
- 551 [2] Gorden A, Osman I, Gai WM, He D, Huang WQ, Davidson A, et al. Analysis of BRAF  
552 and N-RAS mutations in metastatic melanoma tissues. *Cancer Research* 2003;63:3955-7.
- 553 [3] Davies H, Bignell GR, Cox C, Stephens P, Edkins S, Clegg S, et al. Mutations of the  
554 BRAF gene in human cancer. *Nature* 2002;417:949-54.
- 555 [4] Peyssonaux C, Eychene A. The Raf/MEK/ERK pathway: new concepts of activation.  
556 *Biol Cell* 2001;93:53-62.
- 557 [5] McCubrey JA, Steelman LS, Chappell WH, Abrams SL, Wong EW, Chang F, et al. Roles  
558 of the Raf/MEK/ERK pathway in cell growth, malignant transformation and drug resistance.  
559 *Biochim Biophys Acta* 2007;1773:1263-84.
- 560 [6] Fedorenko IV, Paraiso KH, Smalley KS. Acquired and intrinsic BRAF inhibitor  
561 resistance in BRAF V600E mutant melanoma. *Biochem Pharmacol* 2011;82:201-9.
- 562 [7] Poulidakos PI, Persaud Y, Janakiraman M, Kong XJ, Ng C, Moriceau G, et al. RAF  
563 inhibitor resistance is mediated by dimerization of aberrantly spliced BRAF(V600E). *Nature*  
564 2011;480:387-U144.
- 565 [8] Villanueva J, Infante JR, Krepler C, Reyes-Uribe P, Samanta M, Chen HY, et al.  
566 Concurrent MEK2 mutation and BRAF amplification confer resistance to BRAF and MEK  
567 inhibitors in melanoma. *Cell Rep* 2013;4:1090-9.
- 568 [9] Larkin J, Del Vecchio M, Ascierto PA, Krajsova I, Schachter J, Neyns B, et al.  
569 Vemurafenib in patients with BRAF(V600) mutated metastatic melanoma: an open-label,  
570 multicentre, safety study. *Lancet Oncol* 2014;15:436-44.
- 571 [10] Moriceau G, Hugo W, Hong A, Shi H, Kong X, Yu CC, et al. Tunable-combinatorial  
572 mechanisms of acquired resistance limit the efficacy of BRAF/MEK cotargeting but result in  
573 melanoma drug addiction. *Cancer Cell* 2015;27:240-56.
- 574 [11] Wang J, Yao Z, Jonsson P, Allen AN, Qin ACR, Uddin S, et al. A Secondary Mutation  
575 in BRAF Confers Resistance to RAF Inhibition in a BRAF(V600E)-Mutant Brain Tumor.  
576 *Cancer Discov* 2018;8:1130-41.
- 577 [12] Villanueva J, Infante JR, Krepler C, Reyes-Uribe P, Samanta M, Chen HY, et al.  
578 Concurrent MEK2 Mutation and BRAF Amplification Confer Resistance to BRAF and MEK  
579 Inhibitors in Melanoma. *Cell Reports* 2013;4:1090-9.
- 580 [13] Nazarian R, Shi H, Wang Q, Kong X, Koya RC, Lee H, et al. Melanomas acquire  
581 resistance to B-RAF(V600E) inhibition by RTK or N-RAS upregulation. *Nature*  
582 2010;468:973-7.
- 583 [14] Wagle N, Van Allen EM, Treacy DJ, Frederick DT, Cooper ZA, Taylor-Weiner A, et al.  
584 MAP kinase pathway alterations in BRAF-mutant melanoma patients with acquired  
585 resistance to combined RAF/MEK inhibition. *Cancer Discov* 2014;4:61-8.
- 586 [15] Villanueva J, Vultur A, Lee JT, Somasundaram R, Fukunaga-Kalabis M, Cipolla AK, et  
587 al. Acquired resistance to BRAF inhibitors mediated by a RAF kinase switch in melanoma  
588 can be overcome by cotargeting MEK and IGF-1R/PI3K. *Cancer Cell* 2010;18:683-95.
- 589 [16] Greger JG, Eastman SD, Zhang V, Bleam MR, Hughes AM, Smitheman KN, et al.  
590 Combinations of BRAF, MEK, and PI3K/mTOR inhibitors overcome acquired resistance to  
591 the BRAF inhibitor GSK2118436 dabrafenib, mediated by NRAS or MEK mutations. *Mol*  
592 *Cancer Ther* 2012;11:909-20.
- 593 [17] Paraiso KHT, Xiang Y, Rebecca VW, Abel EV, Chen YA, Munko AC, et al. PTEN Loss  
594 Confers BRAF Inhibitor Resistance to Melanoma Cells through the Suppression of BIM  
595 Expression. *Cancer Research* 2011;71:2750-60.

- 596 [18] Hanahan D, Weinberg RA. The hallmarks of cancer. *Cell* 2000;100:57-70.
- 597 [19] Smalley KSM, Lioni M, Palma MD, Xiao M, Desai B, Egyhazi S, et al. Increased cyclin
- 598 D1 expression can mediate BRAF inhibitor resistance in BRAF V600E-mutated melanomas.
- 599 *Molecular Cancer Therapeutics* 2008;7:2876-83.
- 600 [20] Martin CA, Cullinane C, Kirby L, Abuhammad S, Lelliott EJ, Waldeck K, et al.
- 601 Palbociclib synergizes with BRAF and MEK inhibitors in treatment naive melanoma but not
- 602 after the development of BRAF inhibitor resistance. *Int J Cancer* 2018;142:2139-52.
- 603 [21] Yoshida A, Lee EK, Diehl JA. Induction of Therapeutic Senescence in Vemurafenib-
- 604 Resistant Melanoma by Extended Inhibition of CDK4/6. *Cancer Res* 2016;76:2990-3002.
- 605 [22] Yadav V, Burke TF, Huber L, Van Horn RD, Zhang Y, Buchanan SG, et al. The
- 606 CDK4/6 inhibitor LY2835219 overcomes vemurafenib resistance resulting from MAPK
- 607 reactivation and cyclin D1 upregulation. *Mol Cancer Ther* 2014;13:2253-63.
- 608 [23] Tsai J, Lee JT, Wang W, Zhang J, Cho H, Mamo S, et al. Discovery of a selective
- 609 inhibitor of oncogenic B-Raf kinase with potent antimelanoma activity. *Proc Natl Acad Sci U*
- 610 *S A* 2008;105:3041-6.
- 611 [24] Bollag G, Hirth P, Tsai J, Zhang J, Ibrahim PN, Cho H, et al. Clinical efficacy of a RAF
- 612 inhibitor needs broad target blockade in BRAF-mutant melanoma. *Nature* 2010;467:596-9.
- 613 [25] Shi HB, Moriceau G, Kong XJ, Lee MK, Lee H, Koya RC, et al. Melanoma whole-
- 614 exome sequencing identifies B-V600E-RAF amplification-mediated acquired B-RAF
- 615 inhibitor resistance. *Nature Communications* 2012;3.
- 616 [26] Forbes SA, Beare D, Boutselakis H, Bamford S, Bindal N, Tate J, et al. COSMIC:
- 617 somatic cancer genetics at high-resolution. *Nucleic Acids Res* 2017;45:D777-D83.
- 618 [27] Garcia EP, Minkovsky A, Jia YH, Ducar MD, Shivdasani P, Gong X, et al. Validation of
- 619 OncoPanel A Targeted Next-Generation Sequencing Assay for the Detection of Somatic
- 620 Variants in Cancer. *Archives of Pathology & Laboratory Medicine* 2017;141:751-8.
- 621 [28] Xu H, Xiao T, Chen CH, Li W, Meyer CA, Wu Q, et al. Sequence determinants of
- 622 improved CRISPR sgRNA design. *Genome Res* 2015;25:1147-57.
- 623 [29] Wang B, Wang M, Zhang W, Xiao T, Chen CH, Wu A, et al. Integrative analysis of
- 624 pooled CRISPR genetic screens using MAGeCKFlute. *Nat Protoc* 2019.
- 625 [30] Li W, Koster J, Xu H, Chen CH, Xiao T, Liu JS, et al. Quality control, modeling, and
- 626 visualization of CRISPR screens with MAGeCK-VISPR. *Genome Biol* 2015;16:281.
- 627 [31] Girotti MR, Pedersen M, Sanchez-Laorden B, Viros A, Turajlic S, Niculescu-Duvaz D,
- 628 et al. Inhibiting EGF receptor or SRC family kinase signaling overcomes BRAF inhibitor
- 629 resistance in melanoma. *Cancer Discov* 2013;3:158-67.
- 630 [32] Antony R, Emery CM, Sawyer AM, Garraway LA. C-RAF Mutations Confer Resistance
- 631 to RAF Inhibitors. *Cancer Research* 2013;73:4840-51.
- 632 [33] Kwong LN, Boland GM, Frederick DT, Helms TL, Akid AT, Miller JP, et al. Co-clinical
- 633 assessment identifies patterns of BRAF inhibitor resistance in melanoma. *J Clin Invest*
- 634 2015;125:1459-70.
- 635 [34] Corcoran RB, Ebi H, Turke AB, Coffee EM, Nishino M, Cogdill AP, et al. EGFR-
- 636 Mediated Reactivation of MAPK Signaling Contributes to Insensitivity of BRAF-Mutant
- 637 Colorectal Cancers to RAF Inhibition with Vemurafenib. *Cancer Discovery* 2012;2:227-35.
- 638 [35] Cotto KC, Wagner AH, Feng YY, Kiwala S, Coffman AC, Spies G, et al. DGIdb 3.0: a
- 639 redesign and expansion of the drug-gene interaction database. *Nucleic Acids Res*
- 640 2018;46:D1068-D73.
- 641 [36] Sherr CJ, McCormick F. The RB and p53 pathways in cancer. *Cancer Cell* 2002;2:103-
- 642 12.
- 643 [37] Malumbres M, Barbacid M. Cell cycle, CDKs and cancer: a changing paradigm. *Nat*
- 644 *Rev Cancer* 2009;9:153-66.

- 645 [38] Malumbres M, Barbacid M. Is Cyclin D1-CDK4 kinase a bona fide cancer target?  
646 *Cancer Cell* 2006;9:2-4.
- 647 [39] Malumbres M, Barbacid M. To cycle or not to cycle: A critical decision in cancer.  
648 *Nature Reviews Cancer* 2001;1:222-31.
- 649 [40] Buenrostro JD, Giresi PG, Zaba LC, Chang HY, Greenleaf WJ. Transposition of native  
650 chromatin for fast and sensitive epigenomic profiling of open chromatin, DNA-binding  
651 proteins and nucleosome position. *Nat Methods* 2013;10:1213-8.
- 652 [41] Zheng R, Wan C, Mei S, Qin Q, Wu Q, Sun H, et al. Cistrome Data Browser: expanded  
653 datasets and new tools for gene regulatory analysis. *Nucleic Acids Res* 2019;47:D729-D35.
- 654 [42] Corces MR, Granja JM, Shams S, Louie BH, Seoane JA, Zhou W, et al. The chromatin  
655 accessibility landscape of primary human cancers. *Science* 2018;362.
- 656 [43] Kollmann K, Heller G, Sexl V. c-JUN prevents methylation of p16(INK4a) (and Cdk6):  
657 the villain turned bodyguard. *Oncotarget* 2011;2:422-7.
- 658 [44] Schreiber M, Kolbus A, Piu F, Szabowski A, Mohle-Steinlein U, Tian JM, et al. Control  
659 of cell cycle progression by c-Jun is p53 dependent. *Genes & Development* 1999;13:607-19.
- 660 [45] Ramsdale R, Jorissen RN, Li FZ, Al-Obaidi S, Ward T, Sheppard KE, et al. The  
661 transcription cofactor c-JUN mediates phenotype switching and BRAF inhibitor resistance in  
662 melanoma. *Science Signaling* 2015;8.
- 663 [46] Titz B, Lomova A, Le A, Hugo W, Kong XJ, ten Hoeve J, et al. JUN dependency in  
664 distinct early and late BRAF inhibition adaptation states of melanoma. *Cell Discovery* 2016;2.
- 665 [47] Wisdom R, Johnson RS, Moore C. c-Jun regulates cell cycle progression and apoptosis  
666 by distinct mechanisms. *EMBO J* 1999;18:188-97.
- 667 [48] Taylor-Harding B, Aspuria PJ, Agadjanian H, Cheon DJ, Mizuno T, Greenberg D, et al.  
668 Cyclin E1 and RTK/RAS signaling drive CDK inhibitor resistance via activation of E2F and  
669 ETS. *Oncotarget* 2015;6:696-714.
- 670 [49] Wang B, Krall EB, Aguirre AJ, Kim M, Widlund HR, Doshi MB, et al. ATXN1L, CIC,  
671 and ETS Transcription Factors Modulate Sensitivity to MAPK Pathway Inhibition. *Cell*  
672 *Reports* 2017;18:1543-57.
- 673 [50] Tadesse S, Yu M, Kumarasiri M, Le BT, Wang S. Targeting CDK6 in cancer: State of  
674 the art and new insights. *Cell Cycle* 2015;14:3220-30.
- 675 [51] Hugo W, Shi H, Sun L, Piva M, Song C, Kong X, et al. Non-genomic and Immune  
676 Evolution of Melanoma Acquiring MAPKi Resistance. *Cell* 2015;162:1271-85.
- 677 [52] Gowrishankar K, Snoyman S, Pupo GM, Becker TM, Kefford RF, Rizos H. Acquired  
678 Resistance to BRAF Inhibition Can Confer Cross-Resistance to Combined BRAF/MEK  
679 Inhibition (vol 132, pg 1850, 2012). *Journal of Investigative Dermatology* 2013;133:2493-.
- 680 [53] Hou P, Wu C, Wang Y, Qi R, Bhavanasi D, Zuo Z, et al. A Genome-Wide CRISPR  
681 Screen Identifies Genes Critical for Resistance to FLT3 Inhibitor AC220. *Cancer Res*  
682 2017;77:4402-13.
- 683 [54] Shalem O, Sanjana NE, Hartenian E, Shi X, Scott DA, Mikkelsen TS, et al. Genome-  
684 Scale CRISPR-Cas9 Knockout Screening in Human Cells. *Science* 2014;343:84-7.
- 685 [55] Singleton KR, Crawford L, Tsui E, Manchester HE, Maertens O, Liu X, et al. Melanoma  
686 Therapeutic Strategies that Select against Resistance by Exploiting MYC-Driven  
687 Evolutionary Convergence. *Cell Rep* 2017;21:2796-812.
- 688 [56] Asghar U, Witkiewicz AK, Turner NC, Knudsen ES. The history and future of targeting  
689 cyclin-dependent kinases in cancer therapy. *Nat Rev Drug Discov* 2015;14:130-46.
- 690 [57] Sondergaard JN, Nazarian R, Wang Q, Guo D, Hsueh T, Mok S, et al. Differential  
691 sensitivity of melanoma cell lines with BRAFV600E mutation to the specific Raf inhibitor  
692 PLX4032. *J Transl Med* 2010;8:39.
- 693 [58] Sanjana NE, Shalem O, Zhang F. Improved vectors and genome-wide libraries for  
694 CRISPR screening. *Nat Methods* 2014;11:783-4.

- 695 [59] Ritchie ME, Phipson B, Wu D, Hu Y, Law CW, Shi W, et al. limma powers differential  
696 expression analyses for RNA-sequencing and microarray studies. *Nucleic Acids Res*  
697 2015;43:e47.
- 698 [60] Corces MR, Trevino AE, Hamilton EG, Greenside PG, Sinnott-Armstrong NA, Vesuna  
699 S, et al. An improved ATAC-seq protocol reduces background and enables interrogation of  
700 frozen tissues. *Nat Methods* 2017;14:959-62.
- 701 [61] Qin Q, Mei S, Wu Q, Sun H, Li L, Taing L, et al. ChiLin: a comprehensive ChIP-seq  
702 and DNase-seq quality control and analysis pipeline. *BMC Bioinformatics* 2016;17:404.
- 703 [62] Quinlan AR, Hall IM. BEDTools: a flexible suite of utilities for comparing genomic  
704 features. *Bioinformatics* 2010;26:841-2.
- 705 [63] Love MI, Huber W, Anders S. Moderated estimation of fold change and dispersion for  
706 RNA-seq data with DESeq2. *Genome Biol* 2014;15:550.
- 707 [64] Wang S, Sun H, Ma J, Zang C, Wang C, Wang J, et al. Target analysis by integration of  
708 transcriptome and ChIP-seq data with BETA. *Nat Protoc* 2013;8:2502-15.
- 709 [65] Ianevski A, He L, Aittokallio T, Tang J. SynergyFinder: a web application for analyzing  
710 drug combination dose-response matrix data. *Bioinformatics* 2017;33:2413-5.
- 711 [66] Warde-Farley D, Donaldson SL, Comes O, Zuberi K, Badrawi R, Chao P, et al. The  
712 GeneMANIA prediction server: biological network integration for gene prioritization and  
713 predicting gene function. *Nucleic Acids Res* 2010;38:W214-20.

## 714 **Figure Legends**

715 **Figure 1 Pooled CRISPR/Cas9-based screens performed in a BRAFi resistant**  
716 **melanoma cell line.**

717 **A.** Category of 6K-cancer sgRNA library. **B.** Schematic representation of the workflow for  
718 CRISPR screens performed in M238R1 melanoma cells. **C.** Pearson correlation of beta score  
719 between two replicates of CRISPR screen data under the treatment of DMSO (top panel) and  
720 PLX4720 (bottom panel) in the M238R1 cell line. **D.** Rank of the differential beta score  
721 between PLX treatment and vehicle. The two vertical lines indicate +/-1 standard deviation of  
722 the difference between treatment and control beta scores. Red dots are genes whose beta  
723 score increased after treatment. Blue dots are genes whose beta score decreased after  
724 treatment. Gray dots are genes whose beta score did not change significantly between  
725 different conditions. **E.** Beta scores of SOS1, RAF1, HRAS, EGFR, and SRC in the  
726 PLX4720 condition and DMSO condition. **F.** Pathway enrichment analysis of the essential  
727 322 genes whose  $\beta$  score decreased upon the BRAFi treatment compared to DMSO treatment.

728

729 **Figure 2. Loss of CDK6 sensitizes cells to BRAFi treatment in M238R1.**

730 **A.** Volcano plot showing differentially expressed genes between M238R1 and its parental  
731 cell line under the treatment of PLX. The horizontal and vertical lines indicate the cutoff  
732 (Fold change  $\geq 1.5$ ; FDR  $\leq 0.05$ ) of differential genes. **B.** Beta score of the screen (left  
733 panel) and expression (right panel) of the intersect genes which are more essential in the  
734 BRAFi treatment condition and upregulated in the BRAFi-resistant cell line. **C.** Western blots

735 were performed to determine the efficiency of CDK6 sgRNAs. GAPDH was used as a  
736 loading control. The M238R1 cells were infected with lentiviruses expressing the indicated  
737 sgRNAs at low MOI and selected with puromycin. Cell lysates were blotted with the  
738 indicated antibodies. **D.** Loss of CDK6 sensitizes cells to BRAFi treatment in clonogenic  
739 assay. Images of colonies in colony formation assay were presented. Results are  
740 representative of duplicate biological experiments.

741 **Figure 3. The differences of DNA accessibility between sensitive and resistant cells.**

742 **A.** Genome-wide density plots showing that specific and shared ATAC-Seq peaks in BRAFi  
743 sensitive and resistant cell lines treated with PLX. Each row represents one peak. The color  
744 represents the intensity of chromatin accessibility. Peaks are aligned at the center of regions.  
745 **B.** TF motif enrichment. Expected (x axis) versus observed (y axis) percentages of M238R1-  
746 specific overlapping each TF binding site annotation. **C.** Network view of the genes which  
747 up-regulated in resistant lines treated with BRAFi and also associated with M238R1-specific  
748 peaks. Here, nodes represent genes and an edge connecting two genes if both are in the same  
749 pathway. The pathway information is extracted from the GeneMANIA database [66].

750 **Figure 4. Deficiency of CDK6 or ETV5 combined with PLX4720 inhibit cell**  
751 **proliferation of BRAFi-resistant cells.**

752 **A.** Factors which potentially regulate CDK6 are showed in this plot. The y-axis represents the  
753 regulatory potential (RP) score which were calculated using Cistrome Data Browser Toolkit.  
754 The x-axis represents different factors. Dots in an x-axis line means the same factor. **B.**  
755 Browser representation of the region near JUN from ATAC-seq of M238 and M238R1 with  
756 different treatment conditions. **C.** Interaction of JUN and genes whose essentiality increased  
757 after PLX treatment. Interaction partners of JUN was predicted using STRING database.  
758 Colored lines indicate different sources of evidence for each interaction. JUN and ETV5 were  
759 individually labeled by the different colors to distinguish them with other genes. **D.** Rank plot  
760 of the TF whose motif enriched in the ETV5 Chip-seq peaks. The Zscores are calculated  
761 according to their sequence logo similarity using Cistrome MDSeqPos [40]. For the "Zscore"  
762 with negative number, the smaller ones mean significantly enriched. **E.** Validation of ETV5  
763 knockout (KO) in M238R1 cells by western blotting using indicated antibodies.

764 **Figure 5. Combination treatment of CDK6i and BRAFi overcame BRAFi resistance in**  
765 **vitro.**

766 **A.** Immunoblot of lysates M238 and M238R1 cells that were treated with CDK6 inhibitor at a  
767 dosage of 1  $\mu$ M for 24h and for 72 h. The blot is representative of at least two independent  
768 experiments. **B.** The colony formation assay of the combination of palbociclib and PLX-4720

769 for M238R and M229R5 cell lines. Visualization of the calculated 2D synergy maps of cell  
770 line M238R1 (C) and M229R5 (D). An overall synergy score is calculated as the deviation of  
771 phenotypic responses compared to the expected values, averaged over the full dose–response  
772 matrix.

773 **Figure 6. CDK6 and ETV5 expression correlates with cancer progression in patients**  
774 **treated with BRAFi.**

775 **A.** Expression of ETV5, CDK6, and CCND1 in BRAFi treated patients and progression  
776 patients. Correlation of Progression-free survival (PFS) with the CDK6 signature of pre-  
777 treatment in cohort 1 (B), pre-treatment in cohort 2 (C), on-treatment patients in cohort 2(D).  
778 CDK6 signature overexpression corresponds to worse clinical outcome in a cohort 1 (E) and  
779 cohort 2 (F) patients with melanoma cancer.

780 **Supplementary material**

781 **Figure S1. BRAF V600E mutation and BRAF inhibitor PLX-4720 resistance**

782 **A.** Growth curves for parental melanoma cell lines and their isogenic BRAFi-resistant sub-  
783 lines. Cells were treated with the PLX4720 for 72 h. **B.** Codons encoding glutamic acid at  
784 amino acid position 600 highlighted in red.

785 **Figure S2. The quality control measurements of the CRISPR screens**

786 **A.** Read counts and mapping ratio. **B.** Number of missed sgRNAs. **C.** Gini index, which  
787 measures read depth evenness within samples. **D.** Violin plot of beta score M238R cells  
788 under DMSO and PLX4720 treatment respectively.

789 **Figure S3. Analysis of positively and negatively selection genes in CRISPR screen**

790 Positively and negatively selected genes in M238R cell line under the DMSO treatment (A)  
791 and PLX4720 treatment (B). The pathway enrichment analysis of the negatively selected  
792 gene in M238R1 cell line treated with DMSO (C) and PLX (D).

793 **Figure S4. Comparison of the genes' beta score in different conditions**

794 **A.** Density plot of differential beta scores compared PLX4720 treatment condition with  
795 DMSO treatment condition. Delta is used to measure the change of beta score in the two  
796 conditions. Delta was calculated by the formula shown in the right panel. If the genes'  
797 differential beta scores are bigger than delta (the red line), these genes' essentiality  
798 decreased after PLX4720 treatment. Delta is 0.134 in our screen data. Genes' differential beta  
799 scores are smaller than minus delta (the blue line), which indicate these genes' essentiality  
800 increased after PLX4720 treatment. **B.** The beta score of M238R1 cell line with the treatment  
801 of DMSO and PLX4720. The two diagonal lines indicate +/-1 delta of the difference between



802 treatment and control beta scores. Red dots are genes whose beta score increased after  
803 treatment. Blue dots are genes whose beta score decreased after treatment.

804 **Figure S5. The differences of expression between sensitive and resistant lines with or**  
805 **without drug treatment**

806 **A.** Volcano plot shows the differential expressed genes between the treatment of PLX4720  
807 and DMSO in BRAFi sensitive cell line (M238). **B.** Enrichment results of the down-regulated  
808 genes after PLX4720 treated compared with vehicle in M238 parental cell line. **C.** Volcano  
809 plot shows the differential expressed genes between the treatment of PLX4720 and DMSO in  
810 BRAFi resistant cell line (M238R1).

811 **Figure S6. The dependency of CDK6 and cell cycle gene in BRAFi-resistant cells**  
812 **between different conditions**

813 **A.** Boxplot of normalized read count of sgRNAs that target CDK6 in BRAFi resistant M238  
814 cell line in Day0, DMSO and PLX4720 conditions. \*\*P < 0.01, \*P < 0.05, two-sided  
815 Wilcoxon signed rank test. NS, not significant. **B.** Beta score of CDK genes in different  
816 treatment conditions. **C.** Volcano plot shows differential expressed CDK genes between the  
817 BRAFi resistant cell line (M238R1) and sensitive cell line with the treatment of PLX4720.

818 **Figure S7. ATAC-seq data quality control**

819 **A.** The median sequence quality score. **B.** Uniquely mapped reads are the number of reads  
820 with mapping quality above 1. The uniquely mapped ratio is the uniquely mapped reads  
821 divided by the total reads. **C.** PCR bottleneck coefficient (PBC) is the locations with only one  
822 read divided by unique locations. **D.** The 10-fold confident peaks are the number of peaks  
823 called by MACS2, where the fold change is 10. **E.** The fraction of non-mitochondrial reads in  
824 peak region (FRiP) score assesses the ChIP-seq signal to noise ratio, which the definition is  
825 the fraction of mapped or usable reads that locate in the called peaks. **F.** The DHS ratio of  
826 reads is the estimated ratio of reads falling in DNaseI Hypersensitive regions. The red lines  
827 indicate the cutoff of good quality data, which was learned from the mass of epigenetic data  
828 by the Cistrome Data Browser.

829 **Figure S8. The dependency and ChIP-seq profiling of ETV5**

830 **A.** Chip-seq piled reads of JUN, JUNB, ETV5. Boxplot (**B**) and segment plot (**C**) of  
831 normalized read count of sgRNAs that target ETV5 in BRAFi resistant M238 cell line in  
832 Day0, DMSO and PLX4720 conditions. \*\*P < 0.01, \*P < 0.05, two-sided Wilcoxon signed  
833 rank test. NS, not significant.

834 **Figure S9. Combination synergy assay in vitro**

835 Dose response of PLX4720 with increasing amounts of Palbociclib for M238R1 (A) and  
836 M229R5 (B) cell lines. An overall synergy score is calculated as the deviation of phenotypic  
837 responses compared to the expected values, averaged over the full dose–response matrix.  
838 Visualization of the calculated 3D synergy maps of M238R1 (C) and M229R5 (D) cell lines.  
839 **Supplementary table 1. sgRNA sequences of 6K CRISPR screen library.**  
840 **Supplementary table 2. Beta score of M238R1 CRISPR Screens.**  
841 **Supplementary table 3. Significantly differentially expressed genes in M238R1 treated**  
842 **with PLX-4720.**  
843 **Supplementary table 4. Mapping ratio of ATAC-seq of M238R1 and M238 cell lines.**  
844 **Supplementary table 5. M238R1 specific peaks**  
845 **Supplementary table 6. 10 genes of CDK6 expression “signature”.**  
846 **Supplementary table 7. sgRNA sequences of CDK6 and ETV5.**  
847

A.

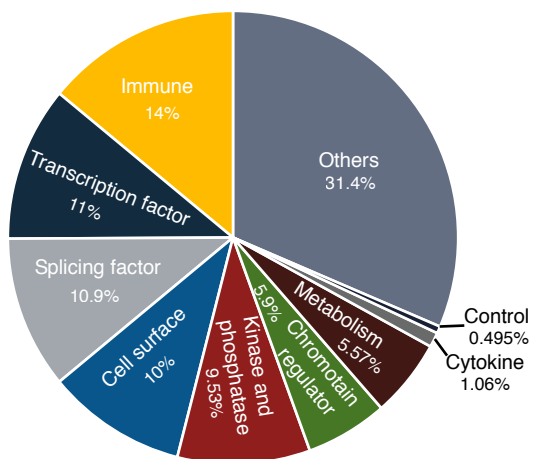

B.

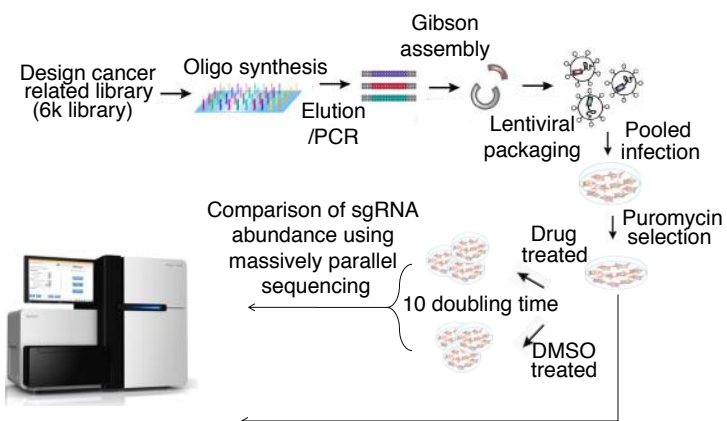

C.

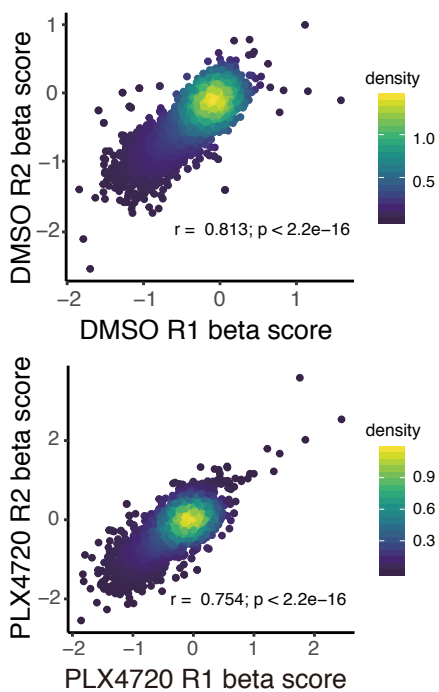

D.

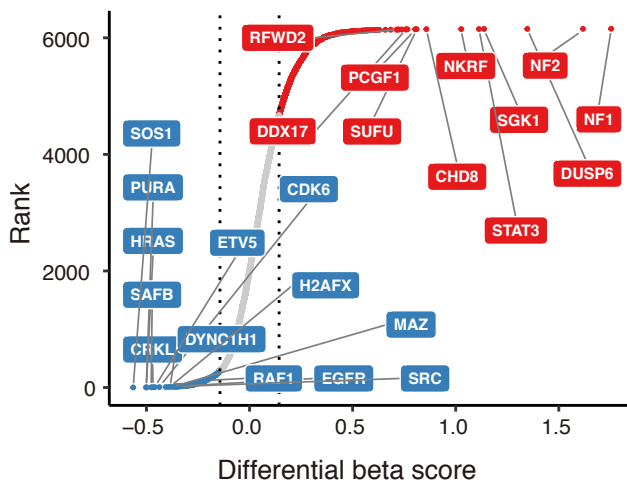

E.

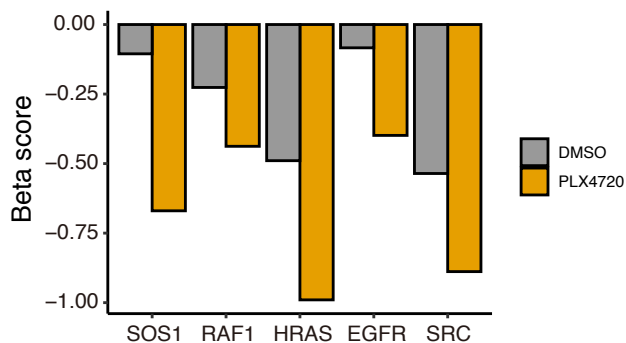

F.

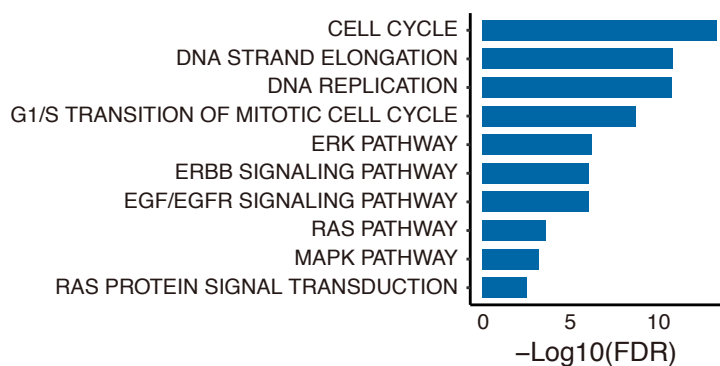

A.

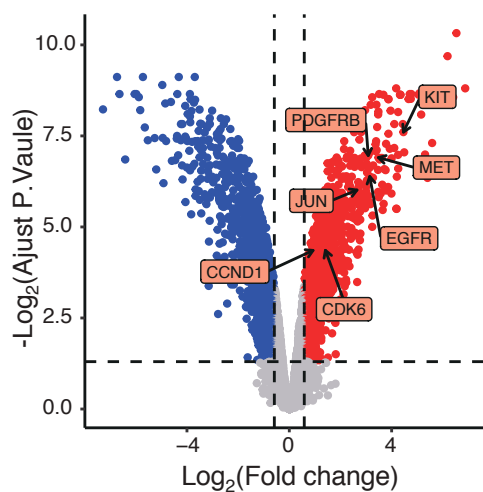

B.

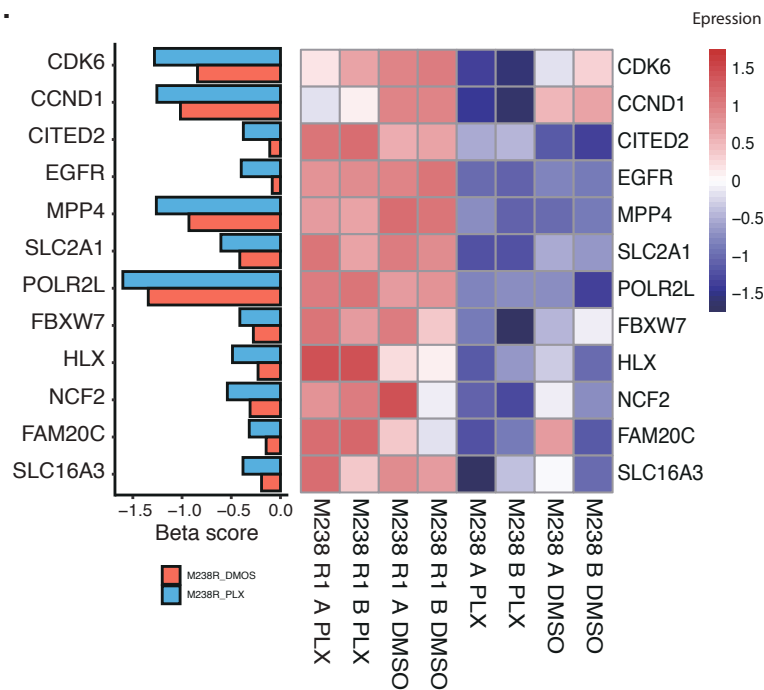

C.

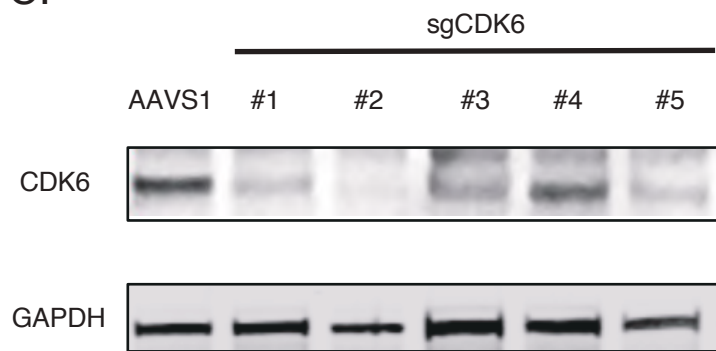

D.

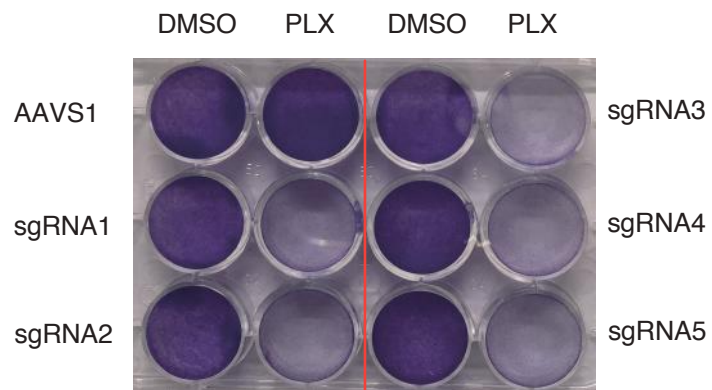

A.

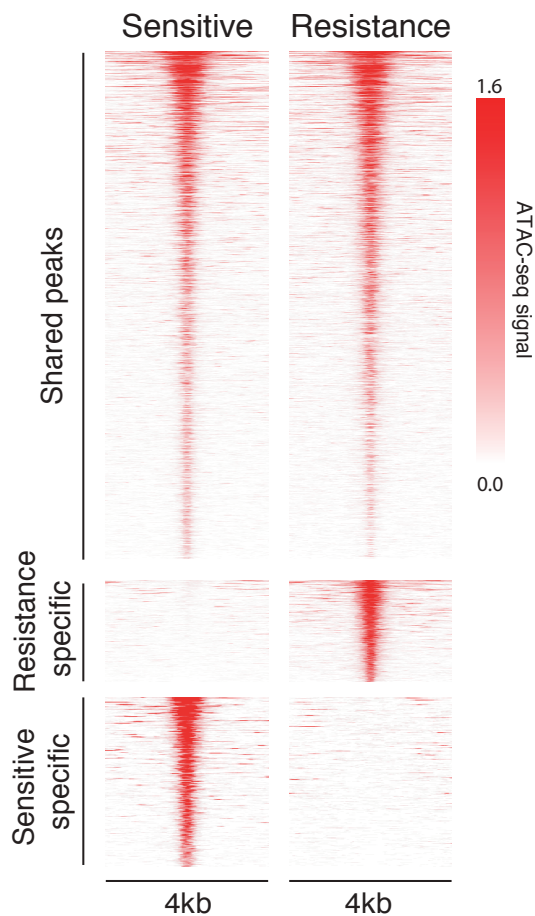

B.

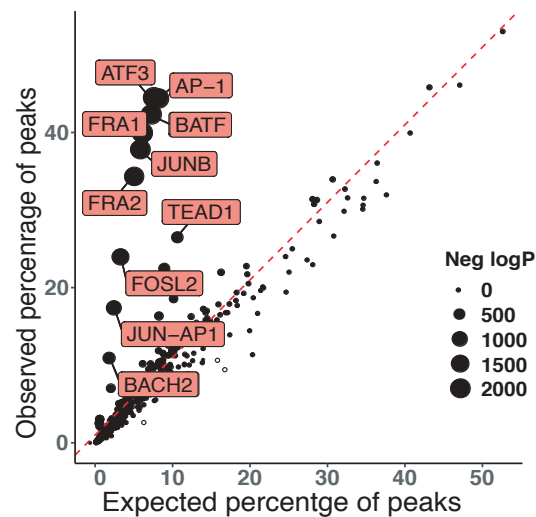

C.

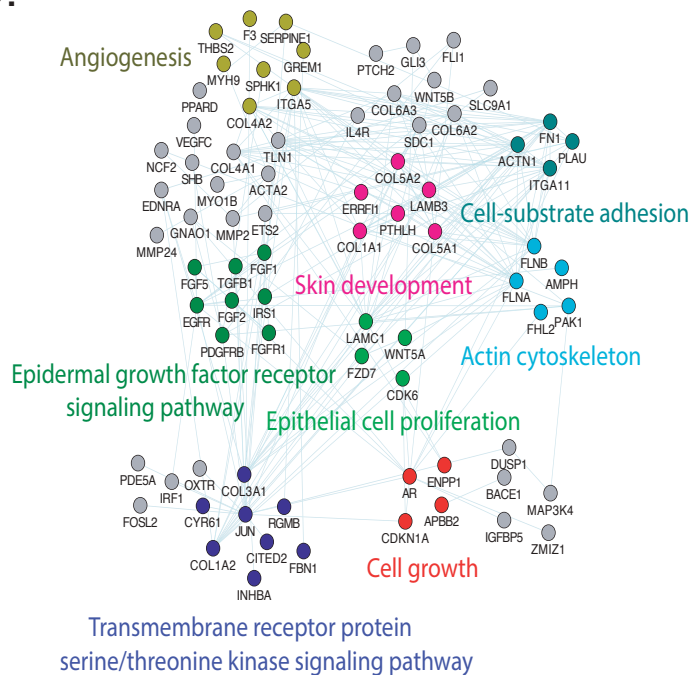

A.

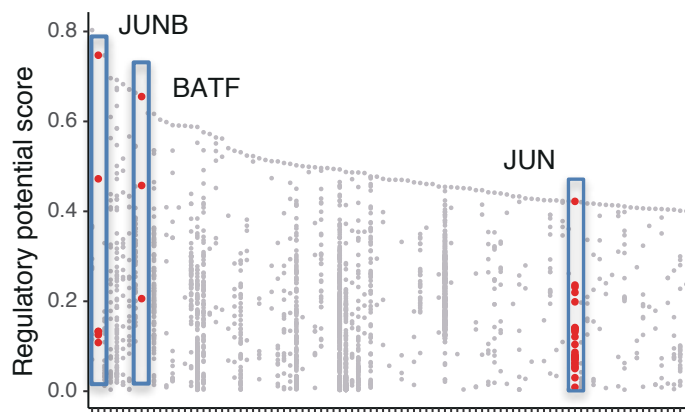

B.

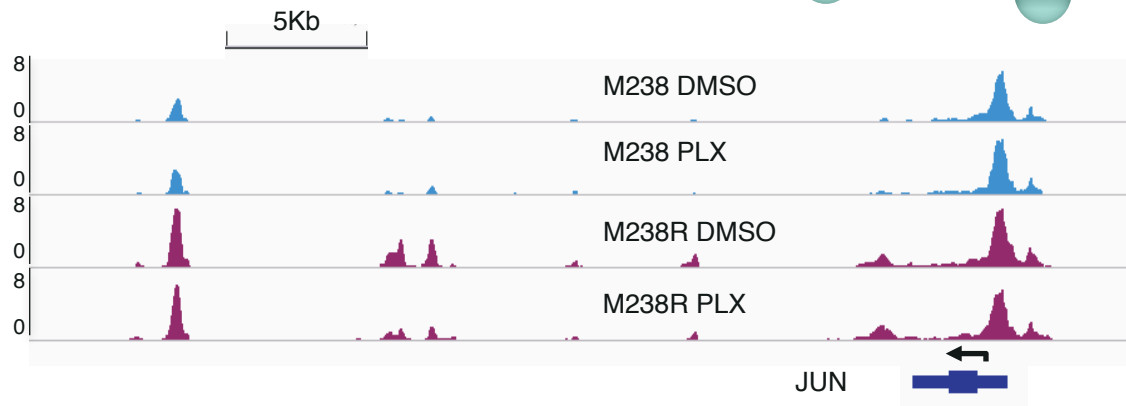

D.

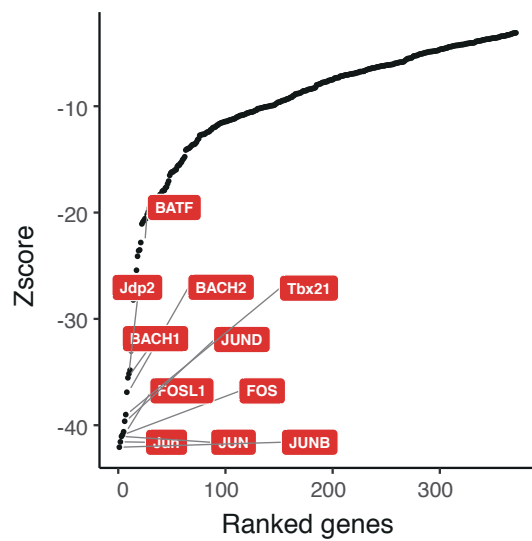

C.

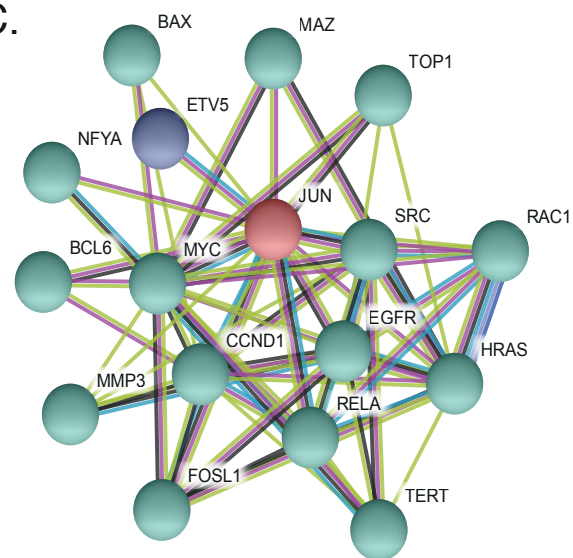

E.

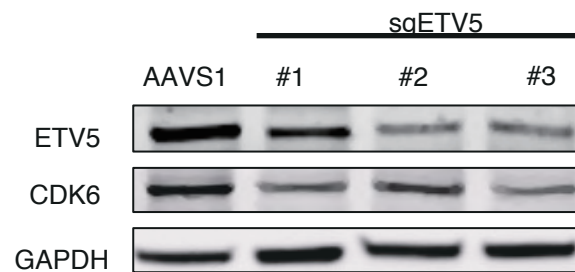

**A.**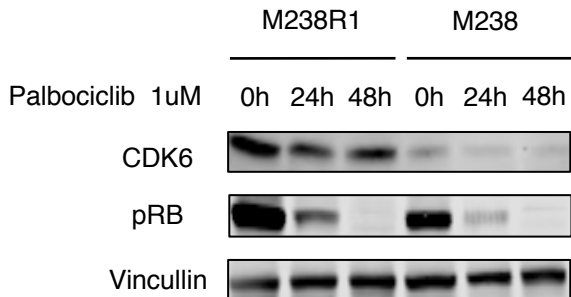**B.**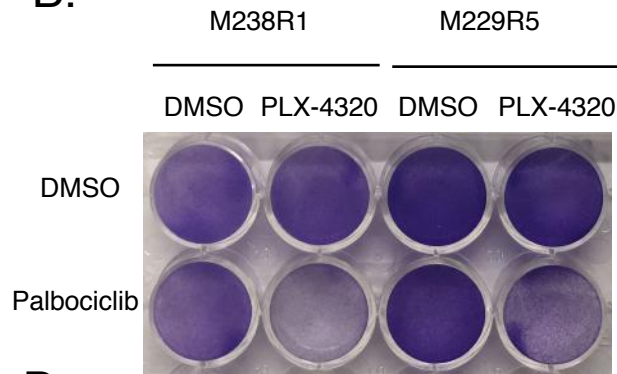**C.**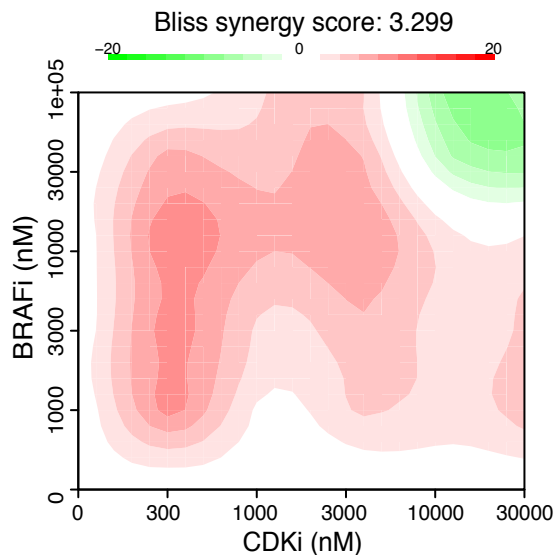**D.**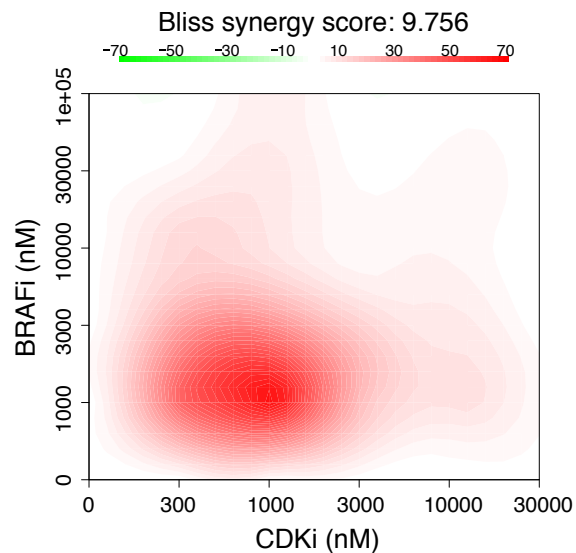

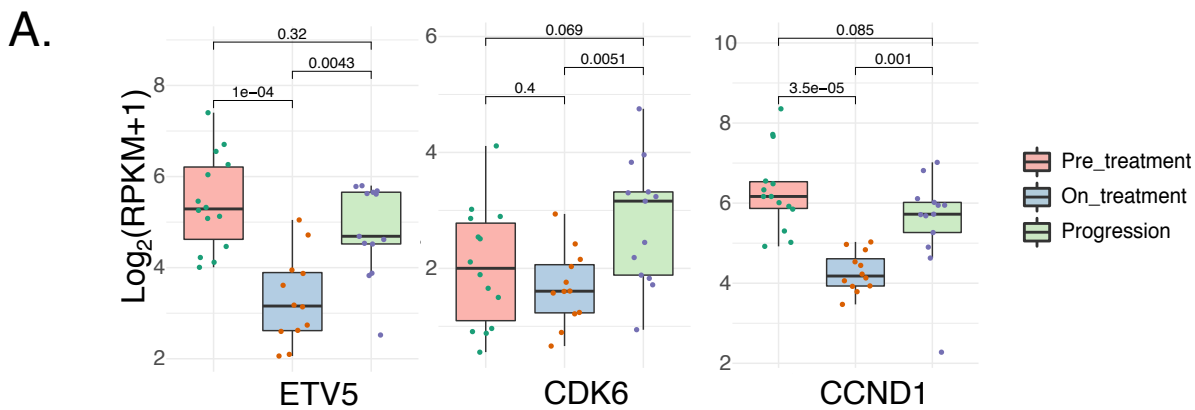

**B.** Cohort 1 pre-treatment

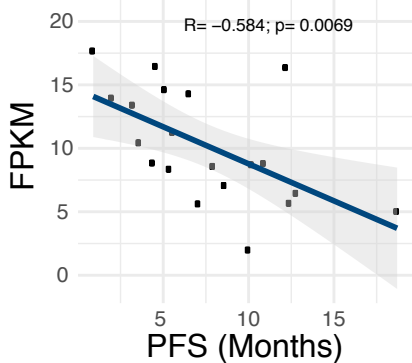

**C.** Cohort 2 pre-treatment

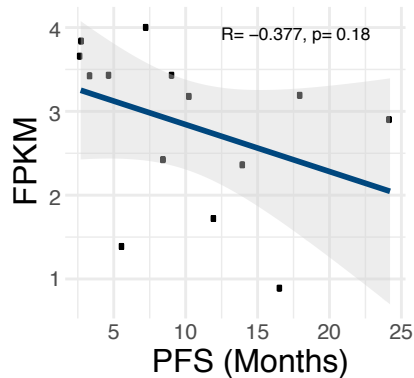

**D.** Cohort 2 on-treatment

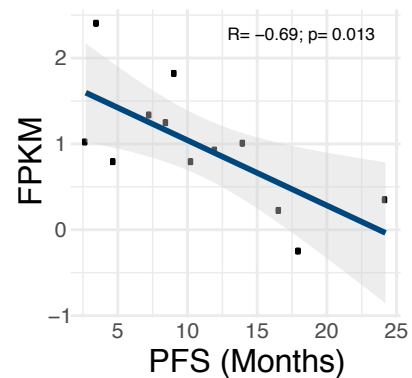

**E.** Cohort 1 pre-treatment

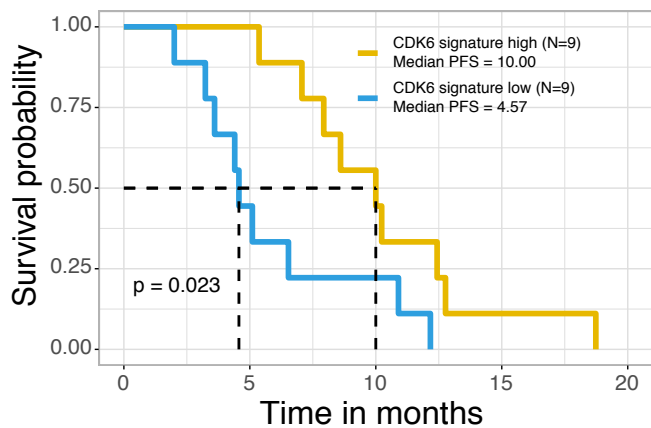

**F.** Cohort 2 pre-treatment

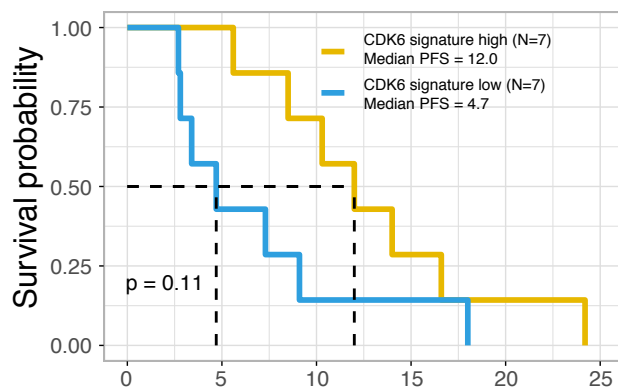

Source: https://www.biorxiv.org/content/10.1101/2019.12.16.876631v1.full.pdf
